# Supplementary material for: Optimized serum stability and specificity of an αvβ6 integrin-binding peptide for tumor targeting
Source: PubMed Central journal article supplement (PMC8138772; doi:10.1016/j.jbc.2021.100657), 2021-04-16
Supplement: mmc1.pdf [file mmc1.pdf]

# JBC Supporting Information

## Optimized serum stability and specificity of an $\alpha v\beta 6$ integrin-binding peptide for tumor targeting

*Ian I. Cardle<sup>1,2</sup>, Michael C. Jensen<sup>1,2,3,4</sup>, Suzie H. Pun<sup>1</sup>, Drew L. Sellers<sup>1,\*</sup>*

<sup>1</sup>*Department of Bioengineering, University of Washington, Seattle, Washington, USA*

<sup>2</sup>*Seattle Children's Therapeutics, Seattle, Washington, USA*

<sup>3</sup>*Department of Pediatrics, University of Washington, Seattle, Washington, USA*

<sup>4</sup>*Program in Immunology, Fred Hutchinson Cancer Research Center, Seattle, Washington, USA*

\*For correspondence: Drew L. Sellers, [drewfus@uw.edu](mailto:drewfus@uw.edu)

### Table of Contents

**Table S1.** Original, cyclized, and modified A20FMDV2 peptide sequences used for binding and serum stability studies.

**Figure S1.** Disulfide cyclization provides less enzymatic stability than DFBP cyclization for the C1C18 peptide.

**Figure S2.** DFBP-cyclized C1C18 A<sub>D</sub> R<sub>D</sub>TK<sub>D</sub>A<sub>D</sub> is degraded into a stable 138 Da smaller product over serum incubation.

**Figure S3.** DFBP-cyclized C2C18 peptides with arginine mimetic-modified RGD motifs fail to bind  $\alpha v\beta 6^+$  cancer cells.

**Table S1. Original, cyclized, and modified A20FMDV2 peptide sequences used for binding and serum stability studies.**

| Peptide                                                                 | Sequence                                                                                                    | Weight (g/mol) |
|-------------------------------------------------------------------------|-------------------------------------------------------------------------------------------------------------|----------------|
| A20FMDV2                                                                | biotin-NAVPNLRGDLQVLAQKVARTK-amide                                                                          | 2517.0         |
| C1C18 DFBP                                                              | biotin-CAVPNLRGDLQVLAQKVCRTK-amide                                                                          | 2832.2         |
| C1C19 DFBP                                                              | biotin-CAVPNLRGDLQVLAQKVACTK-amide                                                                          | 2747.1         |
| C1C20 DFBP                                                              | biotin-CAVPNLRGDLQVLAQKVARCK-amide                                                                          | 2802.1         |
| C2C18 DFBP                                                              | biotin-NCVPNLRGDLQVLAQKVCRTK-amide                                                                          | 2875.2         |
| C2C19 DFBP                                                              | biotin-NCVPNLRGDLQVLAQKVACTK-amide                                                                          | 2790.1         |
| C6C17 DFBP                                                              | biotin-NAVPNCRGDLQVLAQKCACTK-amide                                                                          | 2805.1         |
| C1C18 S-S                                                               | biotin-CAVPNLRGDLQVLAQKVCRTK-amide                                                                          | 2536.1         |
| C2C18 R <sub>D</sub> TKA <sub>D</sub> DFBP                              | biotin-NCVPNLRGDLQVLAQKVCRTK <sub>D</sub> TKA <sub>D</sub> -amide                                           | 2946.3         |
| C2C18 CitTKA <sub>D</sub> DFBP                                          | biotin-NCVPNLRGDLQVLAQKVCRTK <sub>D</sub> CitTKA <sub>D</sub> -amide                                        | 2947.3         |
| C2C18 P <sub>h</sub> R <sub>D</sub> TKA <sub>D</sub> DFBP               | biotin-NCVP <sub>h</sub> NLRGDLQVLAQKVCRTK <sub>D</sub> TKA <sub>D</sub> -amide                             | 2962.3         |
| C1C18 A <sub>D</sub> R <sub>D</sub> TK <sub>D</sub> A <sub>D</sub> DFBP | biotin-CA <sub>D</sub> VPNLRGDLQVLA <sub>D</sub> QKVCRTK <sub>D</sub> TK <sub>D</sub> A <sub>D</sub> -amide | 2903.2         |
| C2C18 <sub>A</sub> FGD RTKA <sub>D</sub> DFBP                           | biotin-NCVPNL <sub>A</sub> FGDLQVLAQKVCRTKA <sub>D</sub> -amide                                             | 2952.3         |
| C2C18 CitGD DFBP                                                        | biotin-NCVPNLCitGDLQVLAQKVCRTK-amide                                                                        | 2876.2         |
| C2C18 <sub>G</sub> FGD R <sub>D</sub> TKA <sub>D</sub> DFBP             | biotin-NCVPNL <sub>G</sub> FGDLQVLAQKVCRTK <sub>D</sub> TKA <sub>D</sub> -amide                             | 2994.3         |

**C**, DFBP-cyclized; **C**, disulfide-cyclized; **R<sub>D</sub>**, D-arginine; **A<sub>D</sub>**, D-alanine; **Cit**, Citrulline; **P<sub>h</sub>**, hydroxyproline; **K<sub>D</sub>**, D-lysine; **<sub>A</sub>F**, 4-aminophenylalanine; **<sub>G</sub>F**, 4-guanidinophenylalanine.

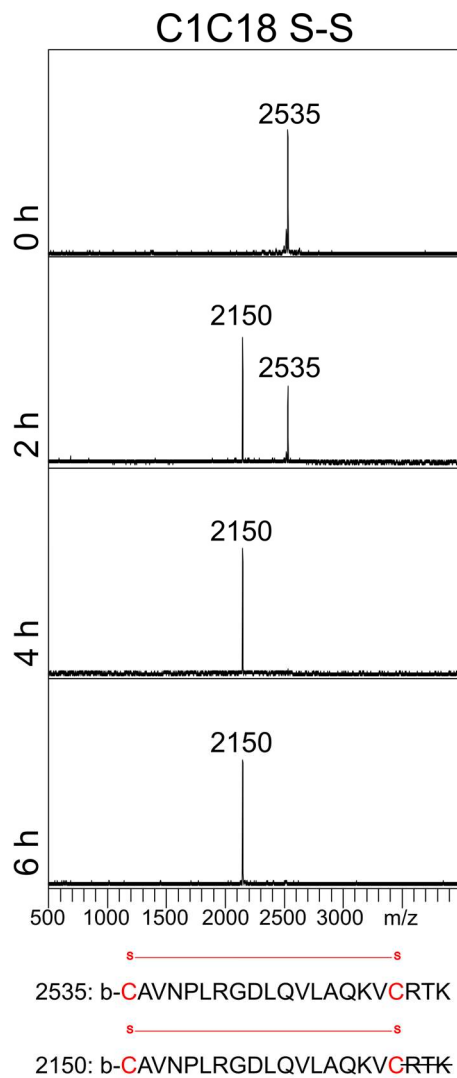

**Figure S1. Disulfide cyclization provides less enzymatic stability than DFBP cyclization for the C1C18 peptide.** MALDI-ToF spectra of disulfide-cyclized C1C18 S-S incubated in normal mouse serum for 0, 2, 4, and 6 h at 37 °C. Molecular weights of prominent peaks are shown. *Bottom:* predicted amino acid sequences of degradation products based on measured molecular weights.

C1C18 A<sub>D</sub> R<sub>D</sub>TK<sub>D</sub>A<sub>D</sub> DFBP  
138 Da Smaller Degradation Product

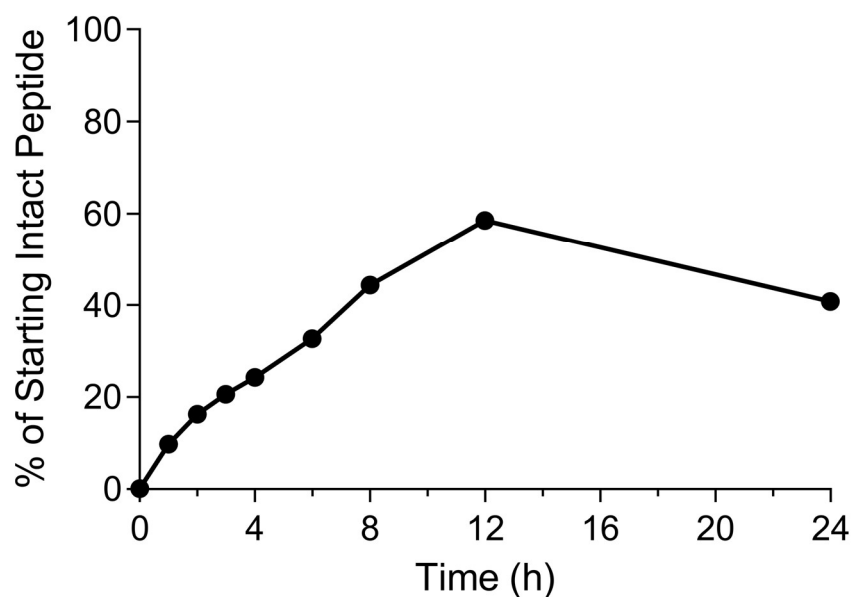

**Figure S2. DFBP-cyclized C1C18 A<sub>D</sub> R<sub>D</sub>TK<sub>D</sub>A<sub>D</sub> is degraded into a stable 138 Da smaller product over serum incubation.** Accumulation of a 138 Da smaller degradation product from the DFBP-cyclized C1C18 A<sub>D</sub> R<sub>D</sub>TK<sub>D</sub>A<sub>D</sub> peptide over a 24-h incubation in normal mouse serum, as measured by LC-MS. Values are normalized to the 0 h timepoint for the intact peptide.

**A**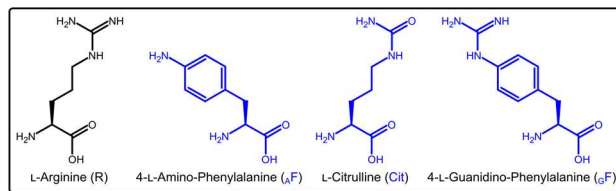

C2C18: biotin-NCVPNLRGDLQVLAQKVCRTK

C2C18<sub>A</sub>FGD RTKA<sub>D</sub>: biotin-NCVPNL<sub>A</sub>FGDLQVLAQKVCRTKA<sub>D</sub>

C2C18 CitGD: biotin-NCVPNLCitGDLQVLAQKVCRTK

C2C18<sub>G</sub>FGD R<sub>D</sub>TKA<sub>D</sub>: biotin-NCVPNL<sub>G</sub>FGDLQVLAQKVCR<sub>D</sub>TKA<sub>D</sub>

**B**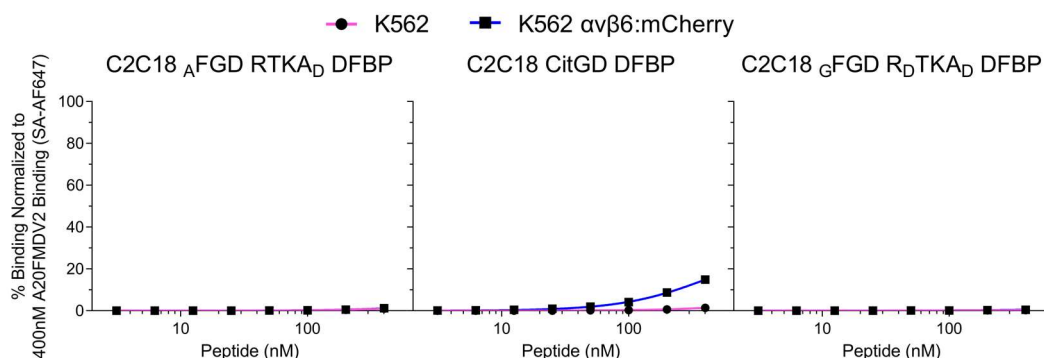

**Figure S3. DFBP-cyclized C2C18 peptides with arginine mimetic-modified RGD motifs fail to bind  $\alpha\beta 6^+$  cancer cells.** *A*, schematic of mimetic substitutions made to the sequence of C2C18 DFBP to replace arginine in the RGD motif. Chemical structures of arginine (*black*) and mimetics (*blue*) are shown for comparison. The resulting mimetic-substituted peptide sequences are also listed, with cysteine substitutions for DFBP cyclization shown in *red* and substitutions and C-terminal modifications shown in *blue*. The RGDLXXL motif that is important for  $\alpha\beta 6$  recognition is *underlined* in all sequences. *B*, flow cytometry binding curves of mimetic-substituted peptides to K562 and K562  $\alpha\beta 6$ :mCherry cells, normalized to 400 nM A20FMDV2 binding to K562  $\alpha\beta 6$ :mCherry cells. The curves represent a nonlinear regression of one independent experiment in which binding data are fitted to a Hill equation. SA-AF647, streptavidin Alexa Fluor 647.
